# Supplementary material for: Effect of concussion on salary and employment: a population-based event time study using a quasi-experimental design
Source: PubMed Central journal article supplement (PMC7580067; doi:10.1136/bmjopen-2020-038161), 2020-10-21
Supplement: bmjopen-2020-038161supp002.pdf [file bmjopen-2020-038161supp002.pdf]

```
*****
*****
*****
*****
*****
*****
*****
```

```
*****
***** This study relies on restricted individual level
administrative data obtained
***** from Statistics Denmark.
```

```
*****
***** Only Danish research environments are granted authorization to
access data from Statistics Denmark. ***** Foreign
***** researchers can, however, get access to micro data through an
affiliation to a Danish authorized
***** environment.
```

```
***** Access is given to anonymized micro data, i.e. data at an
individual personal or corporate level. ***** Access takes
***** place through researcher's own pc over the Internet.
```

```
*****
***** See https://www.dst.dk/en/TilSalg/Forskningservice for detail
*****
```

```
***** For the replication of present study, contact the ROCKWOOL
Foundation for access.
```

```
***** http://www.rockwoolfonden.dk/en/
```

```
*****
*****
*****
*****
*****
*****
```

```
*****
*****
*****
*****
*****
*****
```

```
*****
***** This is the master data do-file for the full package of do-
files that generates the results for
***** Fallesen and Campos (2020). Execute files in the order they
are listed. For each file, specify a ***** home registry in place of
[home]. Further, generate subfolders [home]/data, [home]/tables, and
***** [home]/highdef to capture auxiliary data sets, tables, and
figures.
```

```
*****
*****
*****
*****
```

```
*****  
*****  
  
***Install user-written reghdfe command for faster computation of  
regressions  
ssc install reghdfe  
  
***Generate concussion samples and merges on covariates and outcome  
do 01generate_sample.do  
  
***Generates auxiliary data sets the includes social benefit  
reciency indicator and levels of benefits received  
do 02generate_benefits.do  
  
***Generates auxiliary data sets the includes social benefit  
reciency indicator and levels of benefits received  
do 02generate_benefits.do  
  
***Generate results  
do 03generate_figures_and_results  
  
exit, clear
```

```
clear all
```

```
*****  
*****  
**  
**          This program builds data for Fallesen & Campos  
(2020)  
**          study of concussion's impact on productivity  
measured  
**          through annual salary  
**  
*****  
*****
```

```
**Global for path to registry data  
global dorg "E:/data/rawdata/706630"
```

```
*Global for processed data  
global data "[home]/data"
```

```
/*globals for price index to calculate income at 2015-level across  
years*/  
/*Price index obtained from www.dst.dk/en/statistik/emner/priser-og-  
forbrug/forbrugeriser/nettoprisindeks */
```

```
{  
global price1980 = .358  
global price1981 = .398  
global price1982 = .439  
global price1983 = .466  
global price1984 = .494  
global price1985 = .517  
global price1986 = .521  
global price1987 = .537  
global price1988 = .564  
global price1989 = .594  
global price1990 = .612  
global price1991 = .628  
global price1992 = .642  
global price1993 = .651  
global price1994 = .662  
global price1995 = .674  
global price1996 = .688  
global price1997 = .703  
global price1998 = .713  
global price1999 = .728  
global price2000 = .751  
global price2001 = .769  
global price2002 = .788  
global price2003 = .806  
global price2004 = .817  
global price2005 = .833  
global price2006 = .850
```

```
global price2007 = .867
global price2008 = .899
global price2009 = .917
global price2010 = .936
global price2011 = .960
global price2012 = .978
global price2013 = .986
global price2014 = .994
global price2015 =1.00
global price2016 =1.005
global price2017 =1.017
}

/*Locate concussions and other TBIs from the Danish National Patient
Registry */
/**/
forvalue t = 1977/2017{
    if `t' < 1994 use $dorg/lpr_diag`t'.dta /// **uses ICD-8
codes until Dec. 31, 1993
        if substr(c_diag,1,2)=="85"
    if `t' > 1993 use $dorg/lpr_diag`t'.dta /// **uses ICD-10
codes from Jan. 1, 1994
        if substr(c_diag,1,4)=="DS06"
    **recovers encrypted social security number and admittance
date
merge m:m recnum using $dorg/lpr_adm`t', keepus(pnr d_ind*)
keep(3)
drop _merge recnum

    **Keeps diagnosis, diagnosis type, and individual id (pnr)
keep pnr c_diag c_diagtype pnr d_ind

    **generate year variable
gen year = year(d_ind)

    **generate share of year with concussion
gen time_from_incident = 1-((d_ind-mdy(1,1,year(d_ind))))/
365)
drop d_ind

    *save as one dataset
if `t' > 1977 append using $data/concussion.dta
if `t' == 2017 sort pnr year
save $data/concussion.dta, replace

}
*/
/*****
Sets up datasets for treatment group (x = 0)
and the control groups who suffer concussion
1, 2, 3, 4, 5 years later (x = 1 2 3 4 5).
*****/
```

Treatment group are not allowed to have suffered any type of TBI the last 10 years before concussion, control group are not allowed to have suffered any TBI concussion the last 10 + x years.

```

*****/
/**/
forvalue x = 0/5{
    use $data/concussion.dta, clear
    sort pnr year

    **generate measure of length between registered TBIs
    by pnr: gen help = year-year[_n-1]

    drop if help < 10+`x'

    **Keep only concussion, and only when it was primary
diagnosis
    keep if c_diagtype== "A" & /// Primary daignosis
        (c_diag == "85099" | /// ICD-8 code for concussion
        substr(c_diag,1,5) == "DS060") // ICD-10 code for
concussion

    *generate treatment and control datasets
    save $data/concussion_`x'.dta, replace
}

*/
/*****
Generate datasets for analysis. First incident year is allowed
to be 1992, because it is the first year where we have full record
for the five year plus control group (1977+10+5 = 1992).

We generate seperate datasets for each incident year for treatment
group and different control groups.

*****/
forvalue time = 1/5{          //for different control groups

    local post_period = 5    // local for number of years
observed post                //

concussion for treatment group

    local endtime = 2017-`post_period' /*last year where
we allow for treatment event        to

occur, in order to have long enough control    period.

```

```

Defined by latest year available data*/

    forvalue count = 1992(1)`endtime'{
        local t = `count'                                // for
ease of coding    local n = `t'-4                        // first
pre-treatment event period    local c = `t'+`post_period' //last post-event
period    local w = `t'+`time'                            //time of
concussion for control

        use pnr alder using $dorg/bef`t'                ///
Bring in all 30-49 yr olds    if inrange(alder`t',20,59), clear // from
the population register

        **year variable
        gen year = `t'

        **limit sample to those who suffer a concussion in
`t'
        merge 1:1 pnr year using $data/
concussion_0.dta, ///
            keep(3) nogen

        forvalue x=`n'/'c'{ //add longitudinal data
            merge 1:1 pnr using $dorg/bef`x', ///
                keep(1 3) keepus(efalle alder
koen) //add information on spouse,

            //age, and gender
            rename _merge merge`x' //indicator for
whether in DK that year

            **Add salary information and ses
information
            if `x' < 2017{
                merge 1:m pnr using $dorg/
ind`x', ///    m:1 to account for duplicates
                    nogen keep(1 3)
keepus(erhvervsindk_13 pre_socio personindk dispon_13
aekvivadisp_13) // in data on non-important variables

                    bysort _all: keep if _n ==1
                    //drop perfect duplicates
                    **Align variable names and account

for inflation

                    rename erhvervsindk_13 loenmv
                    rename pre_socio pre_socio`x'

                    foreach kk in personindk dispon_13
aekvivadisp_13 loenmv{

```

```

rename `kk'
`kk'`x'
}
foreach kk in personindk dispon_13
aekvivadisp_13 loenmv{
    replace `kk'`x' =
    `kk'`x'/{price`x'}
}
**Bring in educational information
merge 1:1 pnr using $dorg/
uddany`x', ///
    nogen keep(1 3) keepus(hffsp)
}
if `x' == 2017{
    merge 1:m pnr using $dorg/
ind`x', ///    m:1 to account for duplicates
    nogen keep(1 3)
keepus(erhvervsindk_13 pre_socio personindk) // in data on
non-important variables
    bysort _all: keep if _n ==1
    //drop perfect duplicates
**Align variable names and account
for inflation
    rename erhvervsindk_13 loenmv
    rename pre_socio pre_socio`x'
    foreach kk in personindk loenmv{
`kk'`x'
        rename `kk'
    }
    foreach kk in personindk loenmv{
        replace `kk'`x' =
        `kk'`x'/{price`x'}
    }
**Bring in educational information
merge 1:1 pnr using $dorg/
udda`x', ///
    nogen keep(1 3)
keepus(hfaudd)
    rename hfaudd hfaudd`x'
}
}
**Reshape data to panel structure
if `count'>= 2012 reshape long efalle alder koen
loenmv pre_socio personindk dispon_13 aekvivadisp_13 hffsp merge
hfaudd , i(pnr) j(t)

```

```

        if `count' < 2012 reshape long efalle alder koen
loenmv pre_socio personindk dispon_13 aekvivadisp_13 hffsp merge ,
i(pnr) j(t)

        gen count = t-year          //variable for time to
concuSSION          gen treatment =1 //treatment group indicator

        save $data/sample_temp.dta, replace //temporary
dataset

        /
*****
Now build control sample for time `time' and year
`count'
*****

        use pnr alder using $dorg/bef`t'          ///
Bring in all 30-49 yr olds          if inrange(alder`t',20,59), clear // from
the population register

        **year variable
        gen year = `w' //time for concuSSION for control
group `time'

        **limit sample to those who suffer a concuSSION in
`t'
        merge 1:1 pnr year using $data/
concuSSION_`time'.dta, ///
        keep(3) nogen

        forvalue x=`n'/'`c'{          //add
longitudinal data          merge 1:1 pnr using $dorg/
bef`x', ///
        keep(1 3) keepus(efalle
alder koen) //add information on spouse,

        //age, and gender
        rename _merge merge`x' //indicator
for whether in DK that year          if `x' < 2017{
        **Add salary and SES
information          merge 1:m pnr using
$dorg/ind`x', ///          1:m to account for duplicates
        nogen keep(1 3)
keepus(erhvervsindk_13 pre_socio personindk dispon_13
aekvivadisp_13) // in data on non-important variables

```



```

==1
duplicates                                bysort _all: keep if _n
                                           //drop perfect

                                           **Align variable names

and account for inflation

loenmv                                    rename erhvervsindk_13
pre_socio`x'                              rename pre_socio

dispon_13 aekvivadisp_13 loenmv{         foreach kk in personindk
`kk'`x'                                    rename `kk'
                                           }

dispon_13 aekvivadisp_13 loenmv{         foreach kk in personindk
`kk'`x'/{price`x'}                        replace `kk'`x' =
                                           }

information                               **Bring in educational
$dorg/uddany`x', ///                     merge 1:1 pnr using
keepus(hffsp)                             nogen keep(1 3)
                                           }
                                           if `x' == 2017{
ind`x', ///                               merge 1:m pnr using $dorg/
                                           m:1 to account for duplicates
                                           nogen keep(1 3)
keepus(erhvervsindk_13 pre_socio personindk) // in data on
non-important variables

                                           bysort _all: keep if _n ==1
                                           //drop perfect duplicates
                                           **Align variable names and account

for inflation

rename erhvervsindk_13 loenmv
rename pre_socio pre_socio`x'

foreach kk in personindk loenmv{
`kk'`x'                                    rename `kk'
                                           }

foreach kk in personindk loenmv{
                                           replace `kk'`x' =

```

```

`kk'`x'/{price`x'}
}

**Bring in educational information
merge 1:1 pnr using $dorg/

udda`x', ///
nogen keep(1 3)
keepus(hfaudd)
rename hfaudd hfaudd`x'
}

}

**Reshape data to panel structure
if `count' >= 2012 reshape long efalle alder koen
loenmv pre_socio personindk dispon_13 aekvivadisp_13 hffsp merge
hfaudd , i(pnr) j(t)
if `count' < 2012 reshape long efalle alder koen
loenmv pre_socio personindk dispon_13 aekvivadisp_13 hffsp merge ,
i(pnr) j(t)
gen count = t-`t' //variable for
time to concussion for treatment
gen control`time' =1 //control indicator
save $data/control_temp, replace

**Build sample with treatment and control `time'
for year `count'
use $data/sample_temp
append using $data/control_temp

**fixes control and treatment indicators
replace control`time' = 0 if control`time'==.
replace treatment = 0 if treatment==.

**Picks up changes to education variable
if `count' >=2012{
tostring hfaudd, replace
rename hfaudd start
merge m:1 start using "\
\srvfscenas1\data\Formatter\SAS formater i Danmarks
Statistik\STATA_datsaet\Disced\c_udd_niveau_l1l2_k.dta" , nogen
keep(1 3)
destring UDD, replace force
**Replace all with high school degree or
higher in HFAUDD to have HFFSP = 40000001
replace hffsp = 40000001 if t == 2017 &
inrange(UDD,30,80)
replace hffsp = 0 if t == 2017 & !
inrange(UDD,30,80)
drop UDD start
}

sort pnr t

```

```

                                save $data/sample_control_`count'_`time'.dta,
replace
                                }
}

forvalue time = 1/5{
    forvalue count =2003/2012{
        if `time' ==1 & `count' ==2003 use $data/
sample_control_`count'_`time'.dta, clear
        else append using $data/
sample_control_`count'_`time'.dta
                                if `time' ==5 & `count' ==2012 bysort pnr: keep if
_n ==1
                                if `time' ==5 & `count' ==2012 count
}
}

```

clear

```

*****
*****
*****
*****
**
**          Calculate share of year on public benefits and size
of benefit
**          payments for Fallesen and Campos (2020)
**
**
*****
*****
*****
/*globals for price index to calculate income at 2015-level across
years*/
/*Price index obtained from www.dst.dk/en/statistik/emner/priser-og-
forbrug/forbrugeriser/nettoprisindeks */

global price1980 = .358
global price1981 = .398
global price1982 = .439
global price1983 = .466
global price1984 = .494
global price1985 = .517
global price1986 = .521
global price1987 = .537
global price1988 = .564
global price1989 = .594
global price1990 = .612
global price1991 = .628
global price1992 = .642
global price1993 = .651
global price1994 = .662
global price1995 = .674
global price1996 = .688
global price1997 = .703
global price1998 = .713
global price1999 = .728
global price2000 = .751
global price2001 = .769
global price2002 = .788
global price2003 = .806
global price2004 = .817
global price2005 = .833
global price2006 = .850
global price2007 = .867
global price2008 = .899
global price2009 = .917
global price2010 = .936
global price2011 = .960
global price2012 = .978

```

```
global price2013 = .986
global price2014 = .994
global price2015 =1.00
global price2016 =1.005
global price2017 =1.017

**Global for path to registry data
global dorg "e:/data/rawdata/706630"
*Global for processed data
global data "E:/data/workdata/706630/pf/FallesenCampos/data"

forvalue t=1996/2017{

    ** Read in data on social benefits reciprocity share of
weeks
    ** from the DREAM database
    use $dorg/dream`t'
    gen share =0
    forvalue y = 1/52{
        if `y' < 10 replace share = share+1 if
y_0`y' !=.
        if `y' > 9 replace share = share+1 if
y_`y' !=.
        if `y' < 10 drop y_0`y'
        if `y' > 9 drop y_`y'
    }
    **Generate annual measure of share of year receiving social
benefits
    replace share = share/52
    keep pnr share
    gen t = `t'
    if `t' > 1996 append using $data/temp.dta
    save $data/temp.dta, replace
}

forvalue t=1998/2017{

    **Read in information on size of different types of social
benefits
    if `t' < 2002{
        using $dorg/ind`t'.dta, clear
        use pnr syg_barsel_13 konthj arblhum pre_socio
        replace syg_barsel_13 = syg_barsel_13/{price`t'}
        replace konthj = konthj /{price`t'}
        replace arblhum = arblhum/{price`t'}
        gen kont_dag = konthj+arblhum
        drop konthj arblhum
    }
    if `t' >= 2002 & `t' < 2013{
```

```
        use pnr syg_barsel_13 adagpagn konthj arblhum
pre_socio using $dorg/ind`t'.dta, clear
        replace syg_barsel_13 = syg_barsel_13/{price`t'}
        replace adagpagn = adagpagn/{price`t'}
        replace konthj = konthj /{price`t'}
        replace arblhum = arblhum/{price`t'}
        gen kont_dag = konthj+arblhum
        drop konthj arblhum
    }
    if `t' >= 2013{
        use pnr syg_barsel_13 adagpagn dagpenge_kontant_13
pre_socio using $dorg/ind`t'.dta, clear
        replace syg_barsel_13 = syg_barsel_13/{price`t'}
        replace adagpagn = adagpagn/{price`t'}
        replace dagpenge_kontant_13 =
dagpenge_kontant_13 /{price`t'}
        gen kont_dag = dagpenge_kontant_13-syg_barsel_13
        drop dagpenge_kontant_13
    }
    gen t = `t'
    compress
    bysort pnr: keep if _n ==1
    if `t' > 1998 append using $data/temp2.dta
    if `t' == 2017{
        sort pnr t
    }
    save $data/temp2.dta, replace
}
```

```

clear all

*****
*****
**
**           This program geenrates figerus and results for
Falleesen & Campos (2020)
**           study of concussion's impact on productivity
measured through
**           annual salary
**
*****
*****

**Global for path to registry data
global dorg "E:/data/rawdata/706630"

*Global for processed data
global data "[home]/data"

*Global on figures
global highdef "[home]\highdef"

forvalue time = 1/5{           //for different control groups
    local post_period = 5     // local for number of years
observed post                                     //
concussion for exposure group
    local endtime = 2017-`post_period'           /*last year where
we allow for exposure event                       to
occur, in order to have long enough control      period.
Defined by latest year available data*/

    **Matrixes to capture estimates
matrix results = J(15,6,.) // For salary estimates
matrix results_p = J(15,6,.) // For Pr(salary=0)
estimates
matrix t = J(15,6,.) // For time indicators

forvalue count = 2003(1)`endtime'{
    use $data/sample_control_`count'_`time', clear

    gen female = koen==2

    qui{
        gen edu =0
        replace edu = 1 if inrange(hffsp,
20000000,39000000) | ///

```

```

(hffsp >40000000 & hffsp!=.)
}

**exclude individuals in years where they do not
appear in data,
**due to either death or migration, as well as
periods from when
**the control group suffer their concussion
drop if merge ==1 | count > `time'-1

**generate concussion variable
gen treat = inrange(count,0,`time'-1) & treatment
==1
replace treat = time_from_incident if count ==0 &
treatment ==1

for
**Generate pre-concussion income difference

**use in calculating marginal effects
sum loenmv if count <0 & treatment ==0
local control =r(mean)
sum loenmv if count <0 & treatment ==1
local treat =r(mean)
sum loenmv if count>=0 & treatment ==0
local control_post =r(mean)
gen post = count >=0

**estimate DiD model on salary
reghdfe loenmv treat, abs(alder female post
treatment edu year) cl(pnr)
matrix b =e(b) //regression coefficient
matrix V = e(V) // standard error^2
local n = `count'-2002 //time

matrix results[`n',1] = b[1,1]
matrix results[`n',2] = V[1,1]^0.5
matrix results[`n',3] = b[1,1]/
(`control_post'-(`control'-`treat'))
matrix results[`n',4] = `n'

}
svmat results

rename results1 est
rename results2 se
rename results3 marg
rename results4 time

replace time = time+(`time'-3)*.1 //jitter estimates for
graph

```



```
keep est* se* marg* time
keep if est !=.

replace est = est/7446 //estimate measured as 1000 Euro
replace se = se/7446 //S.E. measured as 1000 Euro

gen upper = est+se*1.96 // Upper CI
gen lower = est-se*1.96 // Lower CI

gen control = `time' //indicate control group

if `time' >1 append using $data/results.dta
save $data/results.dta, replace
}

use $data/results.dta, clear

replace time = 2002+time

*reads in unemployment statistcis obtained from statistikbanken.dk/
en/

gen unemp = 5.8 if time ==2003
replace unemp = 5.8 if time ==2004
replace unemp = 5.1 if time ==2005
replace unemp = 3.9 if time ==2006
replace unemp = 2.7 if time ==2007
replace unemp = 1.9 if time ==2008
replace unemp = 3.6 if time ==2009
replace unemp = 4.2 if time ==2010
replace unemp = 4.0 if time ==2011
replace unemp = 4.5 if time ==2012

scatter est time if control ==1, mcolor(navy) yaxis(1) ysc(range(-4
3) axis(1)) ylab(-4(1)3) || ///
scatter est time if control ==2, mcolor(blue) || ///
scatter est time if control ==3, mcolor(midblue) || ///
scatter est time if control ==4, mcolor(gray) || ///
scatter est time if control ==5, mcolor(ltblue) || ///
rspike upper lower time if control ==1, lcolor(navy) || ///
rspike upper lower time if control ==2, lcolor(blue) || ///
rspike upper lower time if control ==3, lcolor(midblue) || ///
rspike upper lower time if control ==4, lcolor(gray) || ///
rspike upper lower time if control ==5, lcolor(ltblue) || ///
line unemp time , lcolor(black) yaxis(2) ysc(range(0 6) axis(2))
ylab(0(1)6, axis(2)) ///
xsc(range(2002.5 2012.5)) xlab(2003(2)2012) ///
yline(0) ysize(10) xsize(12) graphr(c(white)) ///
xti("Year of concussion for exposure group") scale(.95) ///
legend(label(1 " Control," "{&Delta}=1 yr") ///
label(2 " Control," "{&Delta}=2 yr") ///
label(3 " Control," "{&Delta}=3 yr") ///
```

```

label(4 " Control," "{&Delta}=4 yr") ///
label(5 " Control," "{&Delta}=5 yr") ///
label(6 "% Unemp." "of LF") ///
c(1) order(1 2 3 4 5 6) pos(3) size(small) ///
c(1) symx(4) region(lc(white))) ///
yti("Effect on Salary (in EUR 1K)", height(7) axis(1)) ///
yti("Percent of Full Time Uemployed among LF", height(7) axis(2))

graph export $highdef/marg_est.png, replace width(3900)

forvalue control_time=1/5{
    local end = 2012 // last incident year in data
    if `control_time' ==1    eststo clear

    **build dataset for joint estimate across years
    forvalue count=2003/\`end'{
        if `count'==2003{
            use $data/
        sample_control_`count'_`control_time'.dta, clear
            gen time = `count' //incident year
        indicator
            }
            else append using $data/
        sample_control_`count'_`control_time'.dta
            replace time = `count' if time ==.

        **exclude individuals in years where they do not
        appear in data,
        **due to either death or migration, as well as
        periods from when
        **the control group sufer their concussion
        drop if merge ==1 | count > `control_time'-1
    }

    gen female = koen==2

    //build ident, so we can multivariate cluster for
    individuals
    //who occur bothas control and exposure during the period
    (id)

    bysort pnr time: gen helpx = _n ==1
    gen id= sum(helpx)
    drop helpx

    **Generate educational groups
    qui{
        gen edu =0
        replace edu = 1 if inrange(hffsp,20000000,39000000)
    }
| ///
>40000000 & hffsp!=.) (hffsp

```

```

}

**Calculate number of observations for exposure and control
count if count==0 & treatment ==1
local Ntreated = r(N)
count if count==0 & treatment ==0
local Ncontrol = r(N)

**generate concussion variable
gen treat = inrange(count,0,`control_time'-1) & treatment
==1
replace treat = time_from_incident if count ==0 & treatment
==1

**Generate pre-concussion income difference          for
**use in calculating marginal effects
sum loenmv if count <0 & treatment ==0
local control =r(mean)
sum loenmv if count <0 & treatment ==1
local treat =r(mean)
sum loenmv if count>=0 & treatment ==0
local control_post =r(mean)

forvalue t=-4/4{
    local n = `t'*-1
    if `t' < -1 gen T_`n' = treatment ==1 & count ==`t'
    if `t' > -1 gen T`t' = treatment ==1 & count ==`t'
}

**estimate DiD model on salary
reghdfe loenmv T*, abs(alder female count time treatment
edu) cl(pnr id)
eststo est1_`control_time'
if `control_time'==1 matrix results = J(5,5,.) // matrix to
capture results
if `control_time'==1 matrix results_p = J(5,5,.) // matrix
to capture results
if `control_time'==1 matrix results_pre = J(5,5,.) //
matrix to capture results

matrix b = e(b)
matrix V = e(V)
local n = `control_time'

matrix results[`n',1] = b[1,1] / 7466 // capture beta
results as 1K Euro
matrix results[`n',2] = (V[1,1]^0.5)/7466 //
capture standard error as 1K Euro
matrix results[`n',3] = b[1,1]/(`control_post'-
(`control'-`treat'))
matrix results[`n',4] = `n'

gen no_lon = loenmv<1 //dummy for no salary

```

```

**estimate DiD LP-model for pre-trends
xi: reghdfe loenmv T*, abs(alder female count time
treatment edu) cl(pnr id), if count <0
eststo est3_`control_time'
matrix b =e(b) //regression coefficient
matrix V = e(V) // standard error^2

matrix results_pre[`n',1] = b[1,1]
matrix results_pre[`n',2] = V[1,1]^.5
matrix results_pre[`n',3] = b[1,1]/(`control_post'-
(`control'-`treat'))
matrix results_pre[`n',4] = `n'
}

esttab est1_* using [home]/tables/dynamic1.rtf, ///
replace se(1) b(1) compress nogap star(+ .1 * .05 ** .01
*** .001) ///
keep(T*)

esttab est2_* using [home]/tables/dynamic2.rtf, ///
replace se(3) b(3) compress nogap star(+ .1 * .05 ** .01
*** .001) ///
keep(T*)

esttab est3_* using [home]/tables/pre_trends.rtf, ///
replace se(3) b(3) compress nogap star(+ .1 * .05 ** .01
*** .001) ///
keep(T*)

forvalue control_time=1/5{
local end = 2012 // last incident year in data
if `control_time' ==1 eststo clear
qui{
**build dataset for joint estimate across years
forvalue count=2003/`end'{
if `count'==2003{
use $data/
sample_control_`count'_`control_time'.dta, clear
gen time = `count' //incident year
indicator
}
else append using $data/
sample_control_`count'_`control_time'.dta
replace time = `count' if time ==.

**exclude individuals in years where they
do not appear in data,
**due to either death or migration, as
well as periods from when
**the control group suffer their concussion

```

```

                                drop if merge ==1 | count >
`control_time'-1
    }
    gen female = koen==2
                                **Generate educational groups
    gen edu =0
    replace edu = 1 if inrange(hffsp,20000000,39000000)
| ///
(hffsp >40000000 & hffsp!=.)

individuals    //build ident, so we can multivariate cluster for
period (id)   //who occur both as control and exposure during the

                                bysort pnr time: gen helpx = _n ==1
                                gen id= sum(helpx)
                                drop helpx

control       **Calculate number of observations for exposure and

                                count if count==0 & treatment ==1
                                local Ntreated = r(N)
                                count if count==0 & treatment ==0
                                local Ncontrol = r(N)

treatment ==1 **generate concussion variable
                                gen treat = inrange(count,0,`control_time'-1) &
treatment ==1 replace treat = time_from_incident if count ==0 &

for           **Generate pre-concussion income difference

                                **use in calculating marginal effects
                                sum loenmv if count <0 & treatment ==0
                                local control =r(mean)
                                sum loenmv if count <0 & treatment ==1
                                local treat =r(mean)
                                sum loenmv if count>=0 & treatment ==0
                                local control_post =r(mean)

                                forvalue t=-4/4{
                                local n = `t'*-1
                                if `t' < -1 gen T_`n' = treatment ==1 &
count ==`t'                                if `t' > -1 gen T`t' = treatment ==1 &
count ==`t'
                                }

```

```

gen post = count > -1

**estimate DiD model on salary
reghdfe loenmv treat, abs(alder female post time
treatment edu) cl(pnr id)
eststo est1_`control_time'
if `control_time'==1 matrix results = J(5,5,.) //
matrix to capture results
if `control_time'==1 matrix results_p = J(5,5,.) //
matrix to capture results

matrix b = e(b)
matrix V = e(V)
local n = `control_time'

matrix results[`n',1] = b[1,1] / 7466 //
capture beta results as 1K Euro
matrix results[`n',2] = (V[1,1]^5)/
7466 // capture standard error as 1K Euro
matrix results[`n',3] = b[1,1]/
(`control_post'-(`control'-`treat'))
matrix results[`n',4] = `n'

}
*examining balance of samples
di in ye `control_time'
bysort treatment: sum female alder edu if count ==0
}

svmat results

gen upper = results1+results2*1.96
gen lower = results1-results2*1.96

scatter results1 results4 if results4 ==1, mcolor(navy) || ///
scatter results1 results4 if results4 ==2, mcolor(navy) || ///
scatter results1 results4 if results4 ==3, mcolor(navy) || ///
scatter results1 results4 if results4 ==4, mcolor(navy) || ///
scatter results1 results4 if results4 ==5, mcolor(navy) || ///
rspike upper lower results4 if results4 ==1, lcolor(navy) || ///
rspike upper lower results4 if results4 ==2, lcolor(navy) || ///
rspike upper lower results4 if results4 ==3, lcolor(navy) || ///
rspike upper lower results4 if results4 ==4, lcolor(navy) || ///
rspike upper lower results4 if results4 ==5, lcolor(navy) ///
ysc(range(-2 1)) ylab(-2(.5)1) ///
xsc(range(.5 5.5)) xlabel(1(1)5) ///
yline(0) ysize(10) xsize(12) graphr(c(white)) ///
xti("Years between exposure and control incident") scale(.95) ///

```

```
legend(label(1 " Control," "{&Delta}=1 yr") ///
label(2 " Control," "{&Delta}=2 yr") ///
label(3 " Control," "{&Delta}=3 yr") ///
label(4 " Control," "{&Delta}=4 yr") ///
label(5 " Control," "{&Delta}=5 yr") ///
c(1) order(1 2 3 4 5) pos(3) size(small) ///
c(1) symx(4) region(lc(white))) ///
yti("Effect in 1K Euro ({&delta}{subscript: Salary})",
height(7)) ///
legend(off)

graph export $highdef/est2003_2011.png, replace width(3900)

**Reports marginal effects for period 2003–2011 in percent

gen upper2 = (results3+results2/(results1/results3)*1.96)*100
gen lower2 = (results3–results2/(results1/results3)*1.96)*100
replace results3 = results3*100

scatter results3 results4 , mcolor(navy) || ///
rspike upper2 lower2 results4, lcolor(navy) ///
ysc(range(-5 0)) ylab(-5(.5)0) ///
xsc(range(.5 5.5)) xlab(1(1)5) ///
yline(0) ysize(10) xsize(12) graphr(c(white)) ///
/*title("Percentage change in salary, 2003–10")*/ ///
yti("Salary change (in %)", height(7)) ///
xti("Years between exposure and control incident") scale(.95) ///
legend(label(1 " Control," "{&Delta}=1 yr") ///
label(2 " Control," "{&Delta}=2 yr") ///
label(3 " Control," "{&Delta}=3 yr") ///
label(4 " Control," "{&Delta}=4 yr") ///
label(5 " Control," "{&Delta}=5 yr") ///
c(1) order(1 2 3 4 5) pos(3) size(small) ///
c(1) symx(4) region(lc(white))) legend(off)
/*
note("Marginal effects for exposure dummy across spacing of control
groups. Decrease " ///
"calculated by dividing {&delta} with the normalized control groups'
average salary " ///
"post–concussion. Control groups suffer concussions 1, 2, 3, 4, and
5 years (&Delta) after" ///
"the exposure group. Both control and exposure group are 30–49 years
of age when" ///
"exposure group suffers concussion. 95% confidence intervals.")*/

graph export $highdef/marginal2003_2011.png, replace width(3900)

*****
*****
**
```

```

**              Results for individuals with at least highschool
**
**
*****
*****

forvalue control_time=1/5{
    local end = 2012 // last incident year in data

    **build dataset for joint estimate across years
    forvalue count=2003/`end'{
        if `count'==2003{
            use $data/
sample_control_`count'_`control_time'.dta, clear
            gen time = `count' //incident year
indicator
                }
            else append using $data/
sample_control_`count'_`control_time'.dta
                replace time = `count' if time ==.

                **exclude individuals in years where they do not
appear in data,
                **due to either death or migration, as well as
periods from when
                **the control group suffer their concussion
                drop if merge ==1 | count > `control_time'-1

        }

        gen female = koen==2

        **Generate educational groups
        qui{
            gen edu =0
            replace edu = 1 if inrange(hffsp,20000000,39000000)
| ///
>40000000 & hffsp!=.)
        }

        keep if edu==1

        //build ident, so we can multivariate cluster for
individuals
        //who occur both as control and exposure during the period
(id)

        bysort pnr time: gen helpx = _n ==1
        gen id= sum(helpx)
        drop helpx help

```



```

**Calculate number of observations for exposure and control
count if count==0 & treatment ==1
local Ntreated = r(N)
count if count==0 & treatment ==0
local Ncontrol = r(N)

**generate concussion variable
gen treat = inrange(count,0,`control_time'-1) & treatment
==1
replace treat = time_from_incident if count ==0 & treatment
==1

**Generate pre-concussion income difference          for
**use in calculating marginal effects
sum loenmv if count <0 & treatment ==0
local control =r(mean)
sum loenmv if count <0 & treatment ==1
local treat =r(mean)
sum loenmv if count>=0 & treatment ==0
local control_post =r(mean)

gen post = count >=0

**estimate DiD model on salary
xi: reghdfe loenmv treat, abs(alder female post time
treatment) cl(id pnr)

if `control_time'==1 matrix results_edu = J(5,5,.) //
matrix to capture results
if `control_time'==1 matrix results_p_edu = J(5,5,.) //
matrix to capture results

matrix b = e(b)
matrix V = e(V)
local n = `control_time'

matrix results_edu[`n',1]          = b[1,1] / 7466 //
capture beta results as 1K Euro
matrix results_edu[`n',2]          = (V[1,1]^0.5)/
7466 // capture standard error as 1K Euro
matrix results_edu[`n',3] =      b[1,1]/(`control_post'-
(`control'-`treat'))
matrix results_edu[`n',4] =      `n'

}

*****
*****
**
**           Results for individuals with no high school+
**
**

```

```

*****
*****

forvalue control_time=1/5{
    local end = 2012 // last incident year in data

    **build dataset for joint estimate across years
    forvalue count=2003/`end'{
        if `count'==2003{
            use $data/
sample_control_`count'_`control_time'.dta, clear
            gen time = `count' //incident year
indicator
        }
        else append using $data/
sample_control_`count'_`control_time'.dta
            replace time = `count' if time ==.

        **exclude individuals in years where they do not
appear in data,
        **due to either death or migration, as well as
periods from when
        **the control group sufer their concussion
drop if merge ==1 | count > `control_time'-1

    }

    gen female = koen==2

    //build ident, so we can multivariate cluster for
individuals
    //who occur both as control and exposure during the period
(id)

    bysort pnr time: gen helpx = _n ==1
    gen id= sum(helpx)
    drop helpx help

    **Generate educational groups
    qui{
        gen edu =0
        replace edu = 1 if inrange(hffsp,20000000,39000000)
| ///
>40000000 & hffsp!=.) (hffsp
    }

    keep if edu==0

    **Calculate number of observations for exposure and control

```

```

count if count==0 & treatment ==1
local Ntreated = r(N)
count if count==0 & treatment ==0
local Ncontrol = r(N)

**generate concussion variable
gen treat = inrange(count,0,`control_time'-1) & treatment
==1
replace treat = time_from_incident if count ==0 & treatment
==1

**Generate pre-concussion income difference          for
**use in calculating marginal effects
sum loenmv if count <0 & treatment ==0
local control =r(mean)
sum loenmv if count <0 & treatment ==1
local treat =r(mean)
sum loenmv if count>=0 & treatment ==0
local control_post =r(mean)
gen post = count >=0

**estimate DiD model on salary
xi: reghdfe loenmv treat, abs(alder female post time
treatment) cl(id pnr)

if `control_time'==1 matrix results_noedu = J(5,5,.) //
matrix to capture results
if `control_time'==1 matrix results_p_noedu = J(5,5,.) //
matrix to capture results

matrix b = e(b)
matrix V = e(V)
local n = `control_time'

matrix results_noedu[`n',1]      = b[1,1] / 7466 //
capture beta results as 1K Euro
matrix results_noedu[`n',2]      = (V[1,1]^0.5)/
7466 // capture standard error as 1K Euro
matrix results_noedu[`n',3]      =      b[1,1]/
(`control_post'-(`control'-`treat'))
matrix results_noedu[`n',4]      =      `n'

}
*****
*****
**
**      Draw figure for subgroups
**
**
*****
*****

```

```

local t= -.15

foreach x in noedu edu{
    svmat results_`x'
    replace results_`x'4= results_`x'4+`t'
    svmat results_p_`x'
    replace results_p_`x'4= results_p_`x'4+`t'

    gen upper_`x' = results_`x'1+results_`x'2*1.96
    gen lower_`x' = results_`x'1-results_`x'2*1.96

    gen upper2_`x' = (results_`x'3+results_`x'2/(results_`x'1/
results_`x'3)*1.96)*100
    gen lower2_`x' = (results_`x'3-results_`x'2/(results_`x'1/
results_`x'3)*1.96)*100
    replace results_`x'3 = results_`x'3*100

    gen upper_p_`x' = results_p_`x'1+results_p_`x'2*1.96
    gen lower_p_`x' = results_p_`x'1-results_p_`x'2*1.96

    local t = `t'+.1
}

keep results* upper* lower*
keep if _n <=5

**generate locals for figure

foreach x in noedu edu{
    if "`x'" == "nopay" local color = "navy"
    if "`x'" == "pay" local color = "red"
    if "`x'" == "noedu" local color = "green"
    if "`x'" == "edu" local color = "purple"

    local figure_`x' "scatter results_`x'1 results_`x'4,
mcolor(`color') || rspike upper_`x' lower_`x' results_`x'4,
lcolor(`color') vertical"
    if "`x'" == "nopay" local figure2_`x' "scatter results_`x'3
results_`x'4, mcolor(`color') || rspike upper2_`x' lower2_`x'
results_`x'4, lcolor(`color') vertical "
    else local figure2_`x' "scatter results_`x'3 results_`x'4,
mcolor(`color') || rspike upper2_`x' lower2_`x' results_`x'4,
lcolor(`color') vertical "
    local figure_p_`x' "scatter results_p_`x'1 results_p_`x'4,
mcolor(`color') || rspike upper_p_`x' lower_p_`x' results_p_`x'4,
lcolor(`color') vertical "
}

`figure_noedu' || `figure_edu' ///
legend( ///

```

```
label(1 "Less than" "high school") ///
label(3 "At least" "high school") ///
c(1) order(1 3 ) pos(3) size(small) ///
c(1) symx(4) region(lc(white))) ///
ysc(range(-4 2)) ylab(-4(1)2) ///
xsc(range(.5 5.5)) xlab(1(1)5) ///
yline(0) ysize(10) xsize(12) graphr(c(white)) ///
///title("Parameter estimates across control group, 2003-10") ///
xti("Years between exposure and control incident") scale(.95) ///
yti("Effect in 1K Euro ({&delta}{subscript: Salary})",
height(7)) ///
/*note("Parameter estimates for exposure dummy across spacing of
control groups." ///
"Control groups suffer concussions 1, 2, 3, 4, and 5 years (&Delta)
after the exposure group." ///
"Both control and exposure group are 30-49 years of age when
exposure group suffers " ///
"concussion. 95% confidence intervals.")
*/

graph export $highdef/grouped_est2003_2011.png, replace width(3900)

preserve

`figure2_noedu' || `figure2_edu' ///
legend( ///
label(1 "Less than" "high school") ///
label(3 "At least" "high school") ///
c(1) order(1 3 5) pos(3) size(small) ///
c(1) symx(4) region(lc(white))) ///
ysc(range(-12 3)) ylab(-12(3)3) ///
xsc(range(.5 5.5)) xlab(1(1)5) ///
yline(0) ysize(10) xsize(12) graphr(c(white)) ///
/// title("Percentage change in salary, 2003-10") ///
yti("Salary change (in %)", height(7)) ///
xti("Years between exposure and control incident") scale(.95) ///
/*note("Marginal effects for exposure dummy across spacing of
control groups." ///
"change calculated by {&delta} with the normalized control groups'
average" ///
"salary post-concussion. Control groups suffer concussions 1, 2, 3,
4, and 5 years (&Delta) after" ///
"the exposure group. Both control and exposure group are 30-49 years
of age when" ///
"exposure group suffers concussion. 95% confidence intervals.")*/

graph export $highdef/grouped_marginal2003_2011.png, replace
width(3900)

restore
```

```

*****
*****
**
**           Results different age-groups
**
**
*****
*****

forvalue y=20(5)55{
    forvalue control_time=1/5{
        local end = 2012 // last incident year in data

        **build dataset for joint estimate across years
        forvalue count=2003/`end'{
            if `count'==2003{
                use $data/
sample_control_`count'_`control_time'.dta, clear
                gen time = `count' //incident year
indicator
                }
            else append using $data/
sample_control_`count'_`control_time'.dta
                replace time = `count' if time ==.

                **exclude individuals in years where they
do not appear in data,
                **due to either death or migration, as
well as periods from when
                **the control group suffer their concussion
drop if merge ==1 | count >
`control_time'-1

                }

                gen female = koen==2

                //build ident, so we can multivariate cluster for
individuals
                //who occur both as control and exposure during the
period (id)

                bysort pnr time: gen helpx = _n ==1
                gen id= sum(helpx)
                drop helpx help

                gen nopay = loenmv <1

                **Generate age group
                local z = `y'+4
                gen help = count == 0 & inrange(alder,`y',`z')
                bysort id: egen helpx =max(help)

```

```

keep if helpx == 1
drop helpx help

control          **Calculate number of observations for exposure and
count if count==0 & treatment ==1
local Ntreated = r(N)
count if count==0 & treatment ==0
local Ncontrol = r(N)

**generate concussion variable
gen treat = inrange(count,0,`control_time'-1) &
treatment ==1
replace treat = time_from_incident if count ==0 &
treatment ==1

**Generate pre-concussion income difference
for
**use in calculating marginal effects
sum loenmv if count <0 & treatment ==0
local control =r(mean)
sum loenmv if count <0 & treatment ==1
local treat =r(mean)
sum loenmv if count>=0 & treatment ==0
local control_post =r(mean)
gen post = count >=0

**estimate DiD model on salary
xi: reghdfe loenmv treat, abs(alder female post
time treatment) cl(id pnr)

if `control_time'==1 matrix results_`y' =
J(5,5,.) // matrix to capture results
if `control_time'==1 matrix results_p_`y' =
J(5,5,.) // matrix to capture results

matrix b = e(b)
matrix V = e(V)
local n = `control_time'

matrix results_`y'[`n',1]          = b[1,1] /
7466 // capture beta results as 1K Euro
matrix results_`y'[`n',2]          = (V[1,1]^0.5)/
7466 // capture standard error as 1K Euro
matrix results_`y'[`n',3] =      b[1,1]/
(`control_post'-(`control'-`treat'))
matrix results_`y'[`n',4] =      `n'

}

```

```

}

local t = -.15 //Jitter estimates along x-axis
forvalue x =20(5)55{
    svmat results_`x'
    replace results_`x'4= results_`x'4+`t'
    svmat results_p_`x'
    replace results_p_`x'4= results_p_`x'4+`t'

    gen upper_`x' = results_`x'1+results_`x'2*1.96
    gen lower_`x' = results_`x'1-results_`x'2*1.96

    gen upper2_`x' = (results_`x'3+results_`x'2/(results_`x'1/
results_`x'3)*1.96)*100
    gen lower2_`x' = (results_`x'3-results_`x'2/(results_`x'1/
results_`x'3)*1.96)*100
    replace results_`x'3 = results_`x'3*100

    gen upper_p_`x' = results_p_`x'1+results_p_`x'2*1.96
    gen lower_p_`x' = results_p_`x'1-results_p_`x'2*1.96

    local t = `t'+.1
}

keep results* upper* lower*
keep if _n <=5

**generate locals for figure

forvalue x =20(5)55{
    if `x' == 20 local color = "black"
    if `x' == 25 local color = "orange"
    if `x' == 30 local color = "navy"
    if `x' == 35 local color = "red"
    if `x' == 40 local color = "green"
    if `x' == 45 local color = "purple"
    if `x' == 50 local color = "sienna"
    if `x' == 55 local color = "teal"

    local figure_`x' "scatter results_`x'1 results_`x'4,
mcolor(`color') || rspike upper_`x' lower_`x' results_`x'4,
lcolor(`color') vertical"
    local figure2_`x' "scatter results_`x'3 results_`x'4,
mcolor(`color') || rspike upper2_`x' lower2_`x' results_`x'4,
lcolor(`color') vertical "
    local figure_p_`x' "scatter results_p_`x'1 results_p_`x'4,
mcolor(`color') || rspike upper_p_`x' lower_p_`x' results_p_`x'4,
lcolor(`color') vertical "
}

/**/

```



```

`figure_20' || `figure_25' || `figure_30' || `figure_35' ///
      || `figure_40' || `figure_45' || `figure_50' ||
`figure_55' ///
legend( ///
label(1 "Age 20-24") ///
label(3 "Age 25-29") ///
label(5 "Age 30-34") ///
label(7 "Age 35-39") ///
label(9 "Age 40-44") ///
label(11 "Age 45-49") ///
label(13 "Age 50-54") ///
label(15 "Age 55-59") ///
c(1) order(1 3 5 7 9 11 13 15) pos(3) size(small) ///
c(1) symx(4) region(lc(white))) ///
ysc(range(-4 2)) ylab(-4(1)2) ///
xsc(range(.5 5.5)) xlab(1(1)5) ///
yline(0) ysize(10) xsize(12) graphr(c(white)) ///
/// title("Parameter estimates across control group, 2003-10") ///
xti("Years between exposure and control incident") scale(.95) ///
yti("Effect in 1K Euro ({&delta}{subscript: Salary})",
height(7)) ///
/*note("Parameter estimates for exposure dummy across spacing of
control groups." ///
"Control groups suffer concussions 1, 2, 3, 4, and 5 years (&Delta)
after the exposure group." ///
"Age group described age at time of exposure incident. 95%
confidence intervals.")*/

graph export $highdef/age_est2003_2011.png, replace width(3900)
*/

`figure2_20' || `figure2_25' || `figure2_30' || `figure2_35' ///
      || `figure2_40' || `figure2_45' || `figure2_50' ||
`figure2_55' ///
legend( ///
label(1 "Age 20-24") ///
label(3 "Age 25-29") ///
label(5 "Age 30-34") ///
label(7 "Age 35-39") ///
label(9 "Age 40-44") ///
label(11 "Age 45-49") ///
label(13 "Age 50-54") ///
label(15 "Age 55-59") ///
c(1) order(1 3 5 7 9 11 13 15) pos(3) size(small) ///
c(1) symx(4) region(lc(white))) ///
ysc(range(-12 3)) ylab(-12(3)3) ///
xsc(range(.5 5.5)) xlab(1(1)5) ///
yline(0) ysize(10) xsize(12) graphr(c(white)) ///
yti("Salary change (in %)", height(7)) ///
xti("Years between exposure and control incident") scale(.95)

graph export $highdef/age_marginal2003_2011.png, replace width(3900)

```

```

`figure_p_30' || `figure_p_35' || `figure_p_40' ||
`figure_p_45' /// ///
legend(label(1 "Age 30-34") ///
label(3 "Age 35-39") ///
label(5 "Age 40-44") ///
label(7 "Age 45-49") ///
c(1) order(1 3 5 7) pos(3) size(small) ///
c(1) symx(4) region(lc(white))) ///
ysc(range(-.02 .050)) ylab(-0.02(.01)0.05) ///
xsc(range(.5 5.5)) xlab(1(1)5) ///
yline(0, lcolor(black)) ysize(10) xsize(12) graphr(c(white)) ///
title("Parameter estimates across control group, 2003-10") ///
yti("Effect on Pr(Salary=0)", height(7)) ///
xti("Years between exposure and control incident ({&Delta})")
scale(.95) ///
note("Parameter estimates for exposure dummy across spacing of
control groups." ///
"Control groups suffer concussions 1, 2, 3, 4, and 5 (&Delta) years
after the exposure group." ///
"Age group described age at time of exposure incident. 95%
confidence intervals.")

graph export $highdef/age_nopay2003_2011.png, replace width(3900)

*****
*****
**
**           Results accross gender
**
**
*****
*****

forvalue y=0/1{
    forvalue control_time=1/5{
        local end = 2012 // last incident year in data

        **build dataset for joint estimate across years
        forvalue count=2003/`end'{
            if `count'==2003{
                use $data/
sample_control_`count'_`control_time'.dta, clear
                gen time = `count' //incident year
indicator
                    }
                    else append using $data/
sample_control_`count'_`control_time'.dta
                    replace time = `count' if time ==.

                **exclude individuals in years where they
do not appear in data,
                **due to either death or migration, as
well as periods from when

```

```

                                **the control group suffer their concussion
                                drop if merge ==1 | count >
`control_time'-1

                                }

                                gen female = koen==2

individuals                       //build ident, so we can multivariate cluster for
period (id)                       //who occur both as control and exposure during the

                                bysort pnr time: gen helpx = _n ==1
                                gen id= sum(helpx)
                                drop helpx help

                                gen nopay = loenmv <1

                                **Generate age group
                                local z = `y'+4
                                gen help = count == 0 & female==`y'
                                bysort id: egen helpx =max(help)
                                keep if helpx == 1
                                drop helpx help

control                             **Calculate number of observations for exposure and

                                count if count==0 & treatment ==1
                                local Ntreated = r(N)
                                count if count==0 & treatment ==0
                                local Ncontrol = r(N)

                                **generate concussion variable
                                gen treat = inrange(count,0,`control_time'-1) &
treatment ==1                       replace treat = time_from_incident if count ==0 &
treatment ==1

                                **Generate pre-concussion income difference

for                                   **use in calculating marginal effects
                                sum loenmv if count <0 & treatment ==0
                                local control =r(mean)
                                sum loenmv if count <0 & treatment ==1
                                local treat =r(mean)
                                sum loenmv if count>=0 & treatment ==0
                                local control_post =r(mean)
                                gen post = count >=0

```

```

**estimate DiD model on salary
xi: reghdfe loenmv treat, abs(alder post time
treatment) cl(id pnr)

if `control_time'==1 matrix results_`y' =
J(5,5,.) // matrix to capture results
if `control_time'==1 matrix results_p_`y' =
J(5,5,.) // matrix to capture results

matrix b = e(b)
matrix V = e(V)
local n = `control_time'

matrix results_`y'[`n',1] = b[1,1] /
7466 // capture beta results as 1K Euro
matrix results_`y'[`n',2] = (V[1,1]^.5)/
7466 // capture standard error as 1K Euro
matrix results_`y'[`n',3] = b[1,1]/
(`control_post'-(`control'-`treat'))
matrix results_`y'[`n',4] = `n'

}

}

local t = -.05 //Jitter estimates along x-axis
foreach x in 0 1{
svmat results_`x'
replace results_`x'4= results_`x'4+`t'
svmat results_p_`x'
replace results_p_`x'4= results_p_`x'4+`t'

gen upper_`x' = results_`x'1+results_`x'2*1.96
gen lower_`x' = results_`x'1-results_`x'2*1.96

gen upper2_`x' = (results_`x'3+results_`x'2/(results_`x'1/
results_`x'3)*1.96)*100
gen lower2_`x' = (results_`x'3-results_`x'2/(results_`x'1/
results_`x'3)*1.96)*100
replace results_`x'3 = results_`x'3*100

gen upper_p_`x' = results_p_`x'1+results_p_`x'2*1.96
gen lower_p_`x' = results_p_`x'1-results_p_`x'2*1.96

local t = `t'+.1

}

keep results* upper* lower*
keep if _n <=5

```

```

**generate locals for figure

foreach x in 0 1{
    if `x' == 0 local color = "red"
    if `x' == 1 local color = "green"

    local figure_`x' "scatter results_`x'1 results_`x'4,
mcolor(`color') || rspike upper_`x' lower_`x' results_`x'4,
lcolor(`color') vertical"
    local figure2_`x' "scatter results_`x'3 results_`x'4,
mcolor(`color') || rspike upper2_`x' lower2_`x' results_`x'4,
lcolor(`color') vertical "
    local figure_p_`x' "scatter results_p_`x'1 results_p_`x'4,
mcolor(`color') || rspike upper_p_`x' lower_p_`x' results_p_`x'4,
lcolor(`color') vertical "
}

`figure_0' || `figure_1' ///
legend(label(1 "Men") ///
label(3 "Women") ///
c(1) order(1 3) pos(3) size(small) ///
c(1) symx(4) region(lc(white))) ///
ysc(range(-4 2)) ylab(-4(1)2) ///
xsc(range(.5 5.5)) xlab(1(1)5) ///
yline(0) ysize(10) xsize(12) graphr(c(white)) ///
/// title("Parameter estimates across control group, 2003-10") ///
xti("Years between exposure and control incident") scale(.95) ///
yti("Effect in 1K Euro ( $\Delta$ Salary)",
height(7)) ///
/*note("Parameter estimates for exposure dummy across spacing of
control groups." ///
"Control groups suffer concussions 1, 2, 3, 4, and 5 years ( $\Delta$ )
after the exposure group." ///
"95% confidence intervals.")*/

graph export $highdef/gender_est2003_2011.png, replace width(3900)

`figure2_0' || `figure2_1' ///
legend( ///
label(1 "Men") ///
label(3 "Women") ///
c(1) order(1 3 5 7) pos(3) size(small) ///
c(1) symx(4) region(lc(white))) ///
ysc(range(-12 3)) ylab(-12(3)3) ///
xsc(range(.5 5.5)) xlab(1(1)5) ///
yline(0) ysize(10) xsize(12) graphr(c(white)) ///
/// title("Percentage change in salary, 2003-10") ///
yti("Salary change (in %)", height(7)) ///
xti("Years between exposure and control incident") scale(.95) ///
/* note("Parameter estimates for exposure dummy across spacing of
control groups." ///
"Control groups suffer concussions 1, 2, 3, 4, and 5 years ( $\Delta$ )
after the exposure group." ///

```

```

"95% confidence intervals.))*/

graph export $highdef/gender_marginal2003_2011.png, replace
width(3900)

`figure_p_0' || `figure_p_1'    ///
legend( ///
label(1 "Men") ///
label(3 "Women") ///
c(1) order(1 3 5 7) pos(3) size(small) ///
c(1) symx(4) region(lc(white))) ///
ysc(range(-.02 .050)) ylab(-0.02(.01)0.05) ///
xsc(range(.5 5.5)) xlab(1(1)5) ///
yline(0, lcolor(black)) ysize(10) xsize(12) graphr(c(white)) ///
/// title("Parameter estimates across control group, 2003-10") ///
yti("Effect on Pr(Salary=0)", height(7)) ///
xti("Years between exposure and control incident ({&Delta})")
scale(.95) ///
/*note("Parameter estimates for exposure dummy across spacing of
control groups." ///
"Control groups suffer concussions 1, 2, 3, 4, and 5 years (&Delta)
after the exposure group." ///
"95% confidence intervals.))*/

graph export $highdef/gender_nopay2003_2011.png, replace width(3900)

*****
*****
**
**                Generate descriptive figures of wage
development for exposure
**                and control group
**
**
*****
*****

forvalue control_time=1/5{
    local end = 2012// last incident year in data

    **build dataset for joint estimate across years
    forvalue count=2003/`end'{
        if `control_time' ==1 & `count'==2003{
            use $data/
sample_control_`count'_`control_time'.dta, clear
            gen time = `count' //incident year
indicator
                }
            else append using $data/
sample_control_`count'_`control_time'.dta

                **Drops exposure-group already in the data

```

```

        if `control_time' > 1 drop if time ==. & treatment
==1
        replace time = `count' if time ==.
        replace control1 = `control_time' if
control`control_time'==1
        if `control_time' > 1 drop control`control_time'

        **exclude individuals in years where they do not
appear in data,
        **due to either death or migration, as well as
periods from when
        **the control group suffer their concussion
    }
}

**Generate mean salary for each period relative to exposure groups
concussion
**separately for exposure and each control group
bysort control1 count: egen mean_loen = mean(loenmv)

**Generate mean Pr(sal= for each period relative to exposure groups
concussion
**separately for exposure and each control group
gen no_lon = loenmv < 1

bysort control1 count: egen mean_no_lon = mean(no_lon)

**generate group size
bysort control1 count: gen Ncount=_N if count ==0

**generate pre-exposure mean levels for normalization
gen pre = count <0
bysort control1 pre: egen pre_mean_loen = mean(loenmv) if pre==1
bysort control1 pre: egen pre_mean_no_lon = mean(no_lon) if pre==1

**reduce data set size
bysort control1 count: keep if _n ==1

keep count mean* pre_* control1 Ncount

**standardize to 1k euro
replace mean_loen = mean_loen/7466
replace pre_mean_loen = pre_mean_loen/7466

sort control1 count

**Pre-treatment normalization of salary
```

```
gen norm_mean_lon =mean_loen
gen norm_mean_no_lon =mean_no_lon

forvalue t = 1/5{
    qui sum pre_mean_loen if control == 0
    local treat = r(mean)
    qui sum pre_mean_loen if control == `t'
    local control = r(mean)

    **normalize with pre-concussion difference
    qui replace norm_mean_lon = mean_loen - (`control'-`treat')
if control ==`t'

    qui sum pre_mean_no_lon if control == 0
    local treat = r(mean)
    qui sum pre_mean_no_lon if control == `t'
    local control = r(mean)

    **normalize with pre-concussion difference
    qui replace norm_mean_no_lon = mean_no_lon - (`control'-
`treat') if control ==`t'
}

**local indicators of group sizes
forvalue t=0/5{
    qui sum Ncount if control == `t'
    local C`t' = r(mean)
}

graph twoway ///
    connect mean_l count if control1== 0, ///
    lcolor(black) mcolor(black) || ///
    connect mean_l count if control1== 1, ///
    lcolor(blue) mcolor(blue) || ///
    connect mean_l count if control1== 2, ///
    lcolor(green) mcolor(green) || ///
    connect mean_l count if control1== 3, ///
    lcolor(purple) mcolor(purple) || ///
    connect mean_l count if control1== 4, ///
    lcolor(red) mcolor(red) || ///
    connect mean_l count if control1== 5, ///
    lcolor(orange) mcolor(orange) ///
    legend( ///
        label(1 "Exposure" ///
            "N=`C0'") ///
        label(2 "Control {&Delta}=1" ///
            "N=`C1'") ///
        label(3 "Control {&Delta}=2" ///
            "N=`C2'") ///
        label(4 "Control {&Delta}=3" ///
            "N=`C3'") ///
        label(5 "Control {&Delta}=4" ///
```



```

                                "N=`C4`" ) ///
        label(6 "Control {&Delta}=5" ///
                                "N=`C5`" ) ///
        c(1) order(1 2 3 4 5 6) pos(3) size(small) ///
        c(1) symx(4) region(lc(white))) ///
    ysc(range(26 33)) ylab(26(1)33) ///
    xsc(range(-5 5)) xlab(-5(1)5) ///
    xline(0, lcolor(red)) ysize(10) xsize(12)
graphr(c(white)) ///
///    title("Impact of Concussion on Salary") ///
    yti("Deflated Salaried Income in 1K EUR", height(7)) ///
    xti("Years since exposure group concussion") scale(.95) ///
/*    note("Control groups suffer concussion 1, 2, 3, 4, and 5
years (&Delta) after exposure group." ///
        "Both control and exposure group at 30–49 years of
age at beginning of year =0." ///
        "Vertical line indicates time of exposure group
concussion.")*/

graph export $highdef/FigureS2.png, replace width(3900)

graph twoway ///
    connect norm_mean_l count if control1== 1, ///
    lcolor(blue) mcolor(blue) || ///
    connect norm_mean_l count if control1== 2, ///
    lcolor(green) mcolor(green) || ///
    connect norm_mean_l count if control1== 3, ///
    lcolor(purple) mcolor(purple) || ///
    connect norm_mean_l count if control1== 4, ///
    lcolor(red) mcolor(red) || ///
    connect norm_mean_l count if control1== 5, ///
    lcolor(orange) mcolor(orange) || ///
    connect mean_l count if control1== 0, ///
    lcolor(black) mcolor(black) ///
    legend( ///
        label(1 "Control {&Delta}=1" ///
                "N=`C1`" ) ///
        label(2 "Control {&Delta}=2" ///
                "N=`C2`" ) ///
        label(3 "Control {&Delta}=3" ///
                "N=`C3`" ) ///
        label(4 "Control {&Delta}=4" ///
                "N=`C4`" ) ///
        label(5 "Control {&Delta}=5" ///
                "N=`C5`" ) ///
        label(6 "Exposure" ///
                "N=`C0`" ) ///
        c(1) order(6 1 2 3 4 5) pos(3) size(small) ///
        c(1) symx(4) region(lc(white))) ///
    ysc(range(26 31)) ylab(26(1)31) ///
    xsc(range(-5 5)) xlab(-5(1)5) ///
    xline(0, lcolor(red)) ysize(10) xsize(12)
graphr(c(white)) ///

```

```

///      title("Impact of Concussion on Salary") ///
      yti("Deflated Norm. Salaried Income in 1K EUR",
height(7)) ///
      xti("Years since exposure group's concussion") scale(.95)
      /*///
      note("Control groups suffer concussion 1, 2, 3, 4, and 5
years (&Delta) after exposure group." ///
          "Both control and exposure group at 30–49 years of
age at beginning of year =0." ///
          "Vertical line indicates time of exposure group
concussion." ///
          "Salary levels normalized with pre-concussion level
difference between" ///
          "each control group and the exposure group")*/

graph export $highdef/Figure2.png, replace width(3900)

graph twoway ///
  connect mean_no_l count if control1== 0, ///
  lcolor(black) mcolor(black) || ///
  connect mean_no_l count if control1== 1, ///
  lcolor(blue) mcolor(blue) || ///
  connect mean_no_l count if control1== 2, ///
  lcolor(green) mcolor(green) || ///
  connect mean_no_l count if control1== 3, ///
  lcolor(purple) mcolor(purple) || ///
  connect mean_no_l count if control1== 4, ///
  lcolor(red) mcolor(red) || ///
  connect mean_no_l count if control1== 5, ///
  lcolor(orange) mcolor(orange) ///
  legend( ///
    label(1 "Exposure" ///
          "N=`C0`") ///
    label(2 "Control {&Delta}=1" ///
          "N=`C1`") ///
    label(3 "Control {&Delta}=2" ///
          "N=`C2`") ///
    label(4 "Control {&Delta}=3" ///
          "N=`C3`") ///
    label(5 "Control {&Delta}=4" ///
          "N=`C4`") ///
    label(6 "Control {&Delta}=5" ///
          "N=`C5`") ///
    c(1) order(1 2 3 4 5 6) pos(3) size(small) ///
    c(1) symx(4) region(lc(white))) ///
  ysc(range(.2 .325)) ylab(.2(.025).325) ///
  xsc(range(-5 5)) xlab(-5(1)5) ///
  xline(0, lcolor(red)) ysize(10) xsize(12)
graphr(c(white)) ///
///      title("Impact of Concussion on Prob(Salary=0)") ///
      yti("Prob(Salary=0)", height(7)) ///
      xti("Years since exposure group concussion") scale(.95) ///
/*      note("Control groups suffer concussion 1, 2, 3, 4, and 5

```

```

years (&Delta) after exposure group." ///
    "Both control and exposure group at 30–49 years of
age at beginning of year =0." ///
    "Vertical line indicates time of exposure group
concussion.)**/

graph export $highdef/FigureS3.png, replace width(3900)

graph twoway ///
    connect norm_mean_no_l count if control1== 1, ///
    lcolor(blue) mcolor(blue) || ///
    connect norm_mean_no_l count if control1== 2, ///
    lcolor(green) mcolor(green) || ///
    connect norm_mean_no_l count if control1== 3, ///
    lcolor(purple) mcolor(purple) || ///
    connect norm_mean_no_l count if control1== 4, ///
    lcolor(red) mcolor(red) || ///
    connect norm_mean_no_l count if control1== 5, ///
    lcolor(orange) mcolor(orange) || ///
    connect mean_no_l count if control1== 0, ///
    lcolor(black) mcolor(black) ///
    legend( ///
        label(1 "Control {&Delta}=1" ///
            "N=`C1'" ) ///
        label(2 "Control {&Delta}=2" ///
            "N=`C2'" ) ///
        label(3 "Control {&Delta}=3" ///
            "N=`C3'" ) ///
        label(4 "Control {&Delta}=4" ///
            "N=`C4'" ) ///
        label(5 "Control {&Delta}=5" ///
            "N=`C5'" ) ///
        label(6 "Exposure" ///
            "N=`C0'" ) ///
        c(1) order(6 1 2 3 4 5) pos(3) size(small) ///
        c(1) symx(4) region(lc(white))) ///
    ysc(range(.2 .325)) ylab(.2(.025).325) ///
    xsc(range(-5 5)) xlab(-5(1)5) ///
    xline(0, lcolor(red)) ysize(10) xsize(12)
graphr(c(white)) ///
///    title("Impact of Concussion on Prob(Salary=0)") ///
    yti("Norm. Prob(Salary=0)", height(7)) ///
    xti("Years since exposure group concussion") scale(.95) ///
/*    note("Control groups suffer concussion 1, 2, 3, 4, and 5
years (&Delta) after exposure group." ///
    "Both control and exposure group at 30–49 years of
age at beginning of year =0." ///
    "Vertical line indicates time of exposure group
concussion." ///
    "Probability levels normalized with pre-concussion
level difference between" ///
    "each control group and the exposure group")*/

graph export $highdef/Figure2A.png, replace width(3900)

```

```
*****
*****
**
**      Effects across the salary distribution
**
**
**
*****
*****

forvalue control_time=5/5{
    local end = 2012 // last incident year in data

    **build dataset for joint estimate across years
    forvalue count=2003/\`end'{
        if `count'==2003{
            use $data/
sample_control_`count'_`control_time'.dta, clear
            gen time = `count' //incident year
indicator
                }
                else append using $data/
sample_control_`count'_`control_time'.dta
                replace time = `count' if time ==.

                **exclude individuals in years where they do not
appear in data,
                **due to either death or migration, as well as
periods from when
                **the control group suffer their concussion
                drop if merge ==1 | count > `control_time'-1
        }

        gen female = koen==2
        qui{
            gen edu =0
            replace edu = 1 if inrange(hffsp,20000000,39000000)
| ///
                                                    (hffsp
>40000000 & hffsp!=.)
        }

        //build ident, so we can multivariate cluster for
individuals
        //who occur both as control and exposure during the period
(id)
```

```

bysort pnr time: gen helpx = _n ==1
gen id= sum(helpx)
drop helpx

**generate concussion variable
gen treat = inrange(count,0,`control_time'-1) & treatment
==1
replace treat = time_from_incident if count ==0 & treatment
==1

**effect across salary distribution
if `control_time'==5 matrix results = J(81,5,.) // matrix
to capture results

local n = `control_time'
gen post = count >=0
replace count = count+6
local v =0

qui{
    forvalue t= 0(14932)1045240{
        local top = 42
        local v =1+`v'
        if `n' ==5 matrix results[`v',1]= `t'
        gen D = personindk <=`t'
        reg D treat i.treatment i.post i.edu
i.alder i.female i.time, cl(pnr)
        matrix V = e(V)
        matrix b= e(b)
        matrix results[`v',2] = b[1,1]
        margins, at(treat= (0 1) treatment=1
post=1)
        matrix results[`v',5] = V[1,1]^5
        matrix M = r(b)
        matrix results[`v',4] = M[1,2] //
        matrix results[`v',3] = M[1,1] //
        drop D
    }
}

svmat results

gen l5 = results2-1.96*results5
gen u5 = results2+1.96*results5

replace results1 = results1/7466

gen dif6 = results4-results3
gen udif6 = u5
gen ldif6 = l5

```

```

gr two rline udif6 ldif6 results1, ///
    yaxis(2) color(gray) lp(dash) ylab(0(.01).04, axis(2))
ysec(range(-.006 .04) axis(2)) || ///
    line dif6 results1, yaxis(2) yline(0, axis(2)) ///
    lcolor(black) ylab(0(.01).04) ysec(range(-.006 .04)
axis(2)) || ///
    line results4 results1, yaxis(1) lcolor(red) || ///
    line results3 results1, yaxis(1) lcolor(blue) ///
    ysec(range(0 1)) ylab(0(.1)1, nogrid) xlab(0(10)140)
xsec(range(0 140)) ///
    ysize(10) xsize(12) graphr(c(white)) ///
    xti("Total Income in 1K Euro") scale(1) ///
    yti("Effect of Concussion on Pr(Total Income < X)",
axis(2)) ///
    yti("{&Phi}(Total Income)", axis(1)) ///
    legend( ///
    label(2 "Effect of concussion (left axis)") ///
    label(3 "Concussion income distribution (right axis)") ///
    label(4 "Counterfactual income distribution (right
axis)") ///
    c(1) order(2 3 4) pos(6) size(small) ///
    symx(4) region(lc(white)))

graph export [home]\highdef\l5_income.png, replace width(3900)

cap graph drop g1 g2

gr two ///
    line results4 results1, yaxis(1) lcolor(red) || ///
    line results3 results1, yaxis(1) lcolor(blue) ///
    ysec(range(.2 1)) ylab(0(.1)1) xlab(0(20)140,
labs(small)) ///
    xsec(range(0 140)) ///
    ysize(10) xsize(10) graphr(c(white)) ///
    xti("Total Income in 1K Euro") scale(1) ///
    yti("Cumulative Distribution of Total Income",
axis(1)) ///
    legend( ///
    label(1 "Observed Post-Concussion Total Income
Distribution") ///
    label(2 "Counterfactual No-Concussion Total Income
Distribution") ///
    c(1) order(1 2 4) pos(6) size(small) ///
    symx(4) region(lc(white))) , name(g1)

gr two rline udif6 ldif6 results1, ///
    color(gray) lp(dash) ysec(range(-.002 .035)) || ///
    line dif6 results1, yline(0) ///
    lcolor(black) ylab(0(.01).0325) ysec(range(-.002 .
035)) ///
    xlab(0(20)140, labs(small)) xsec(range(0 140)) ///
    ysize(10) xsize(10) graphr(c(white)) ///

```

```

xiti("Total Income in 1K Euro (X)") scale(1) ///
yti("Effect of Concussion on Pr(Total Income < X)") ///
    legend( label(1 "95% CI") ///
label(2 "Effect of concussion") ///
c(1) order(2 1) pos(6) size(small) ///
    symx(4) region(lc(white))) , name(g2)

graph combine g1 g2      ,graphr(c(white))

graph export "[home]\highdef\figure s2.tif", replace width(1000)

*****
*****
**
**      Effects across the salary distribution
**
**
**
**
*****
*****

forvalue control_time=5/5{
    local end = 2012 // last incident year in data

    **build dataset for joint estimate across years
    forvalue count=2003/`end'{
        if `count'==2003{
            use $data/
sample_control_`count'_`control_time'.dta, clear
            gen time = `count' //incident year
indicator
                }
            else append using $data/
sample_control_`count'_`control_time'.dta
                replace time = `count' if time ==.

                **exclude individuals in years where they do not
appear in data,
                **due to either death or migration, as well as
periods from when
                **the control group sufer their concussion
                drop if merge ==1 | count > `control_time'-1
        }

        gen female = koen==2
        qui{
            gen edu =0
            replace edu = 1 if inrange(hffsp,20000000,39000000)
| ///
                                                                    (hffsp
>40000000 & hffsp!=.)

```

```

    }

    //build ident, so we can multivariate cluster for
individuals
    //who occur both as control and exposure during the period
(id)

    bysort pnr time: gen helpx = _n ==1
    gen id= sum(helpx)
    drop helpx

    **generate concussion variable
    gen treat = inrange(count,0,`control_time'-1) & treatment
==1
    replace treat = time_from_incident if count ==0 & treatment
==1

    **effect across salary distribution
    if `control_time'==5 matrix results = J(81,5,.) // matrix
to capture results

    local n = `control_time'
    gen post = count >=0
    replace count = count+6
    local v =0

    **Estimate Pr(salary < X) across income distribution
    qui{
        forvalue t= 0(14932)895950{
            local top = 42
            local v =1+`v'
            if `n' ==5 matrix results[`v',1]= `t'
            gen D = loenmv <=`t'
            reg D treat i.treatment i.post i.edu
i.alder i.female i.time, cl(pnr)
            matrix V = e(V)
            matrix b= e(b)
            matrix results[`v',2] = b[1,1]
            margins, at(treat= (0 1) treatment=1
post=1)
            matrix results[`v',5] = V[1,1]^5
            matrix M = r(b)
            matrix results[`v',4] = M[1,2] //
            matrix results[`v',3] = M[1,1] //
            drop D
        }
    }

    }

svmat results

*Generate 95% confidence intervals
gen l5 = results2-1.96*results5

```



```

gen u5 = results2+1.96*results5

*Correct to €
replace results1 = results1/7466

*Obtain difference between observed and counterfactual wage
distribution
gen dif6 = results4-results3
gen udif6 = u5
gen ldif6 = l5

gr two rline udif6 ldif6 results1, ///
    yaxis(2) color(gray) lp(dash) ysc(range(-.006 .04) axis(2))
|| ///
    line dif6 results1, yaxis(2) yline(0, axis(2)) ///
    lcolor(black) ylab(0(.01).0325) ysc(range(-.006 .04)
axis(2)) || ///
    line results4 results1, yaxis(1) lcolor(red) || ///
    line results3 results1, yaxis(1) lcolor(blue) ///
    ysc(range(0 1)) ylab(0(.1)1, nogrid) xlab(0(10)120)
xsc(range(0 120)) ///
    ysize(10) xsize(12) graphr(c(white)) ///
    xti("Salary in 1K Euro") scale(1) ///
    yti("Effect of Concussion on Pr(Salary < X)", axis(2)) ///
    yti("{&Phi}(Salary)", axis(1)) ///
    legend( ///
    label(2 "Effect of concussion (left axis)") ///
    label(3 "Concussion salary distribution (right axis)") ///
    label(4 "Counterfactual salary distribution (right
axis)") ///
    c(1) order(2 3 4) pos(6) size(small) ///
    symx(4) region(lc(white)))

cap graph drop g1 g2

gr two ///
    line results4 results1, yaxis(1) lcolor(red) || ///
    line results3 results1, yaxis(1) lcolor(blue) ///
    ysc(range(.2 1)) ylab(0.2(.1)1) xlab(0(10)120,
labs(small)) ///
    xsc(range(0 120)) ///
    ysize(10) xsize(10) graphr(c(white)) ///
    xti("Salary in 1K Euro") scale(1) ///
    yti("Cumulative Distribution of Salary", axis(1)) ///
    legend( ///
    label(1 "Observed Post-Concussion Salary Distribution") ///
    label(2 "Counterfactual No-Concussion Salary
Distribution") ///
    c(1) order(1 2 4) pos(6) size(small) ///
    symx(4) region(lc(white))) , name(g1)

gr two rline udif6 ldif6 results1, ///
    color(gray) lp(dash) ysc(range(-.002 .035)) || ///
    line dif6 results1, yline(0) ///

```

```

lcolor(black) ylab(0(.01).0325) ysc(range(-.002 .
035)) ///
xlab(0(10)120, labs(small)) xsc(range(0 120)) ///
ysize(10) xsize(10) graphr(c(white)) ///
xti("Salary in 1K Euro (X)") scale(1) ///
yti("Effect of Concussion on Pr(Salary < X)") ///
    legend( label(1 "95% CI") ///
label(2 "Effect of concussion") ///
c(1) order(2 1) pos(6) size(small) ///
    symx(4) region(lc(white))) , name(g2)

graph combine g1 g2      ,graphr(c(white))

graph export "[home]\highdef\figure 3.tif", replace width(1000)

**ESTIMATE SICK LEAVE

forvalue control_time=1/5{
    local end = 2012 // last incident year in data
    if `control_time' ==1     eststo clear

    **build dataset for joint estimate across years
    forvalue count=2003/`end'{
        if `count'==2003{
            use $data/
sample_control_`count'_`control_time'.dta, clear
            gen time = `count' //incident year
indicator
                }
            else append using $data/
sample_control_`count'_`control_time'.dta
                replace time = `count' if time ==.

                **exclude individuals in years where they do not
appear in data,
                **due to either death or migration, as well as
periods from when
                **the control group suffer their concussion
                drop if merge ==1 | count > `control_time'-1
        }

        merge m:1 pnr t using $data/temp.dta, keep(1 3) nogen
        replace share = 0 if share==.

        gen female = koen==2

        //build ident, so we can multivariate cluster for
individuals
        //who occur both as control and exposure during the period
(id)

```

```

bysort pnr time: gen helpx = _n ==1
gen id= sum(helpx)
drop helpx

**Generate educational groups
qui{
    gen edu =0
    replace edu = 1 if inrange(hffsp,20000000,39000000)
| ///
>40000000 & hffsp!=.) (hffsp
}

**Calculate number of observations for exposure and control
count if count==0 & treatment ==1
local Ntreated = r(N)
count if count==0 & treatment ==0
local Ncontrol = r(N)

**generate concussion variable
gen treat = inrange(count,0,`control_time'-1) & treatment
==1
replace treat = time_from_incident if count ==0 & treatment
==1

**Generate pre-concussion income difference for
**use in calculating marginal effects
sum loenmv if count <0 & treatment ==0
local control =r(mean)
sum loenmv if count <0 & treatment ==1
local treat =r(mean)
sum loenmv if count>=0 & treatment ==0
local control_post =r(mean)

forvalue t=-4/4{
    local n = `t'*-1
    if `t' < -1 gen T_`n' = treatment ==1 & count ==`t'
    if `t' > -1 gen T_`t' = treatment ==1 & count ==`t'
}

**estimate DiD model on salary
reghdfe share T*, abs(alder female count time treatment
edu) cl(pnr id)
eststo est1_`control_time'
if `control_time'==1 matrix results = J(5,5,.) // matrix to
capture results
if `control_time'==1 matrix results_p = J(5,5,.) // matrix
to capture results

```

```

matrix b = e(b)
matrix V = e(V)
local n = `control_time'

matrix results[`n',1] = b[1,1] / 7466 // capture beta
results as 1K Euro
matrix results[`n',2] = (V[1,1]^5)/7466 //
capture standard error as 1K Euro
matrix results[`n',3] = b[1,1]/(`control_post'-
(`control'-`treat'))
matrix results[`n',4] = `n'

gen no_share = share >0 //dummy for no salary

**Generate pre-concussion probability difference for
**use in calculating marginal effects
sum no_share if count <0 & treatment ==0
local control =r(mean)
sum no_share if count <0 & treatment ==1
local treat =r(mean)
sum no_share if count>=0 & treatment ==0
local control_post =r(mean)

**estimate DiD LP-model on P(salary=0)
xi: reghdfe no_share T*, abs(alder female count time
treatment edu) cl(pnr id)
eststo est2_`control_time'
matrix b =e(b) //regression coefficient
matrix V = e(V) // standard error^2

matrix results_p[`n',1] = b[1,1]
matrix results_p[`n',2] = V[1,1]^5
matrix results_p[`n',3] = b[1,1]/(`control_post'-
(`control'-`treat'))
matrix results_p[`n',4] = `n'
}

esttab est1_* using [home]/tables/dynamic_share1.rtf, ///
replace se(3) b(3) compress nogap star(+ .1 * .05 ** .01
*** .001) ///
keep(T*)

esttab est2_* using [home]/tables/dynamic_share2.rtf, ///
replace se(3) b(3) compress nogap star(+ .1 * .05 ** .01
*** .001) ///
keep(T*)

**ESTIMATE SICK LEAVE

forvalue control_time=1/5{
local end = 2012 // last incident year in data
if `control_time' ==1 eststo clear

```

```

**build dataset for joint estimate across years
forvalue count=2003/\`end'{
    if `count'==2003{
        use $data/
sample_control_`count'_`control_time'.dta, clear
        gen time = `count' //incident year
indicator
        }
        else append using $data/
sample_control_`count'_`control_time'.dta
        replace time = `count' if time ==.

        **exclude individuals in years where they do not
appear in data,
        **due to either death or migration, as well as
periods from when
        **the control group suffer their concussion
drop if merge ==1 | count > `control_time'-1
    }

merge m:1 pnr t using $data/temp2.dta, keep(1 3) nogen
replace syg_barsel_13= 0 if syg_barsel_13==.

gen female = koen==2

//build ident, so we can multivariate cluster for
individuals
//who occur both as control and exposure during the period
(id)

bysort pnr time: gen helpx = _n ==1
gen id= sum(helpx)
drop helpx

**Generate educational groups
qui{
    gen edu =0
    replace edu = 1 if inrange(hffsp,20000000,39000000)
| ///
>40000000 & hffsp!=.)
}

**Calculate number of observations for exposure and control
count if count==0 & treatment ==1
local Ntreated = r(N)
count if count==0 & treatment ==0
local Ncontrol = r(N)

**generate concussion variable
gen treat = inrange(count,0,`control_time'-1) & treatment

```

```

==1
replace treat = time_from_incident if count ==0 & treatment
==1

**Generate pre-concussion income difference      for
**use in calculating marginal effects
sum loenmv if count <0 & treatment ==0
local control =r(mean)
sum loenmv if count <0 & treatment ==1
local treat =r(mean)
sum loenmv if count>=0 & treatment ==0
local control_post =r(mean)

forvalue t=-4/4{
    local n = `t'*-1
    if `t' < -1 gen T_`n' = treatment ==1 & count ==`t'
    if `t' > -1 gen T`t' = treatment ==1 & count ==`t'
}

**estimate DiD model on salary
reghdfe syg_barsel_13 T*, abs(alder female count time
treatment edu) cl(pnr id)
eststo est1_`control_time'
if `control_time'==1 matrix results = J(5,5,.) // matrix to
capture results
if `control_time'==1 matrix results_p = J(5,5,.) // matrix
to capture results

matrix b = e(b)
matrix V = e(V)
local n = `control_time'

matrix results[`n',1] = b[1,1] / 7466 // capture beta
results as 1K Euro
matrix results[`n',2] = (V[1,1]^5)/7466 //
capture standard error as 1K Euro
matrix results[`n',3] = b[1,1]/(`control_post'-
(`control'-`treat'))
matrix results[`n',4] = `n'

**Generate pre-concussion probability difference  for
**use in calculating marginal effects

**estimate DiD LP-model on P(salary=0)
xi: reghdfe kont_dag T*, abs(alder female count time
treatment edu) cl(pnr id)
eststo est2_`control_time'
matrix b =e(b) //regression coefficient
matrix V = e(V) // standard error^2

```

```
matrix results_p[`n',1] = b[1,1]
matrix results_p[`n',2] = V[1,1]^5
*matrix results_p[`n',3] = b[1,1]/(`control_post'-
(`control'-`treat'))
matrix results_p[`n',4] = `n'
}

esttab est1_* using [home]/tables/dynamic_sickpay1.rtf, ///
replace se(3) b(3) compress nogap star(+ .1 * .05 ** .01
*** .001) ///
keep(T*)

esttab est2_* using [home]/tables/dynamic_welfare2.rtf, ///
replace se(3) b(3) compress nogap star(+ .1 * .05 ** .01
*** .001) ///
keep(T*)
```
